# Supplementary material for: Efficient N2 electroreduction to ammonia in an isopropanol–PBS electrolyte using NiFe2O4in situ grown on nickel foam
Source: Royal Society of Chemistry journal article supplement (doi:10.1039/d2ya00364c), 2023-01-01
Supplement: d2ya00364c1.pdf [file d2ya00364c1.pdf]

Supporting Information

## **Efficient N<sub>2</sub> electroreduction to ammonia in isopropanol-PBS electrolyte by NiFe<sub>2</sub>O<sub>4</sub> in situ grown on nickel foam**

Chang Chen,<sup>‡a,b</sup> Min Cui,<sup>‡a</sup> Qian Wang,<sup>\*b</sup> Penglei Cui,<sup>b</sup> Cong Zhang,<sup>a</sup> Qian Yang,<sup>b</sup> Jujie Ren<sup>\*a</sup>

<sup>a</sup>Hebei Provincial Key Laboratory of Photoelectric Control on Surface and Interface, School of Sciences, Hebei University of Science and Technology, Shijiazhuang 050018, P.R. China.

<sup>b</sup>CAS Key Laboratory of Green Process and Engineering, State Key Laboratory of Multiphase Complex Systems, Beijing Key Laboratory of Ionic Liquids Clean Process, Institute of Process Engineering, Chinese Academy of Science, Beijing 100190, P.R. China.

Corresponding Authors

Email: [wangq@ipe.ac.cn](mailto:wangq@ipe.ac.cn), [jujieren@163.com](mailto:jujieren@163.com)

## Ammonia detection

The yield of NH<sub>3</sub> in electrocatalytic nitrogen reduction was determined by indophenol blue method.

Reagents used:

- 1) Coloring solution: 0.05 mol L<sup>-1</sup> sodium hypochlorite solution.
- 2) Oxidation solution: 5% salicylic acid solution (Dissolve 10 g of salicylic acid, 10 g of Sodium citrate and 0.8 g of sodium hydroxide in 200 ml of deionized water.)
- 3) Catalyst solution: 1.0g Na<sub>2</sub>[Fe (CN)<sub>5</sub> NO] •2H<sub>2</sub>O diluted to 10ml with deionized water.
- 4) Absorption solution: 0.1M H<sub>2</sub>SO<sub>4</sub> solution.
- 5) Standard ammonium solution: 0.3142g NH<sub>4</sub>Cl after drying at 105°C for 1h, it is dissolved in 100ml absorption solution to obtain an ammonia content of 1.00mg mL<sup>-1</sup>, dilute to 1.00µg mL<sup>-1</sup> with absorption solution before use.

Procedure:

2 mL of sample was taken. Then 0.2 mL of catalyst solution, 2 mL oxidation solution and 1 mL of coloring solution were added respectively to the sample solution. Absorbance measurements were performed after 1 h at λ=655 nm.

Determination of FE and NH<sub>3</sub> yield:

The FE for N<sub>2</sub> reduction was defined as the amount of electric charge used for synthesizing NH<sub>3</sub> divided the total charge passed through the electrodes during the electrolysis. Assuming three electrons were needed to produce one NH<sub>3</sub> molecule, the NH<sub>3</sub> yield could be calculated as follows:

$$NH_3 \text{ yield} = \frac{[NH_3]V}{At} \quad (1)$$

FE was calculated using the following equation:

$$FE = \frac{3F[NH_3]V}{17Q} 100\% \quad (2)$$

Where:

- F is the Faraday constant;
- [NH<sub>3</sub>] is the measured NH<sub>3</sub> concentration;
- V is the volume of the electrolyte in the cathodic chamber;
- Q is the total quantity of applied electricity;
- t is the reduction time;
- A is the geometric area of the electrode.

## Hydrazine detection

The Possible products of N<sub>2</sub>H<sub>4</sub> in electrocatalytic nitrogen reduction were determined by Watt and Chrisp methods.

Reagents used:

- 1) Coloring solution: Dissolve 1.2g (CH<sub>3</sub>)<sub>2</sub>NC<sub>6</sub>H<sub>4</sub>CHO in 6 ml HCl and 60 ml Ethanol.
- 2) Standard hydrazine solution: 60.1 µL hydrazine solution, dilute to 25ml with a solution composed of the same electrolyte, and the hydrazine concentration is 2 mg mL<sup>-1</sup>. Take 20 µL of the above solution and dilute it again to 20 ml, and the final hydrazine concentration is 2 µg mL<sup>-1</sup>.

Procedure:

Prepare hydrazine standard solutions of different concentrations, dilute them to 5 ml with electrolyte, and add to 5 ml coloring solution. Absorbance measurements were performed after 30 min at  $\lambda=658$  nm, The standard curve equation is obtained according to the relationship between absorbance and concentration. Take 5 ml of electrolytic solution and add 5 ml of developer to measure its absorbance.

### Nitrogen solubility test

The fully automatic gas solubility detector is used to test the solubility of nitrogen in different systems, this instrument is based on the tube in tube micro membrane reactor, which can realize gas-liquid equilibrium in 10~30s, and realize rapid determination of gas-liquid properties through online flow.

Measuring principle:

The solubility  $C_i$  of gas in liquid can be expressed by Henry formula:

$$C_i = K_H P_i \quad (3)$$

In the reactor, the gas transmembrane flux  $F_G$  is equal to the amount of gas dissolved in liquid:

$$C_i = \frac{F_G}{F_L V_s} \quad (4)$$

When balancing, the balanced partial pressure  $P_i$  Equal to the total gas pressure  $P_G$  and the equilibrium pressure of the substance in the liquid phase in the gas phase  $P_i^V$ :

$$P_i = P_G - P_i^V \quad (5)$$

The above equations are combined:

$$K_H = \frac{F_G}{F_L V_s (P_G - P_i^V)} \quad (6)$$

Therefore, by using the Ramping method, the program controls the liquid flow to change continuously at a certain rate, while recording the corresponding gas flow change, fitting the experimental data to obtain the slope of  $F_G$ - $F_L$ , and then the Henry coefficient can be measured.

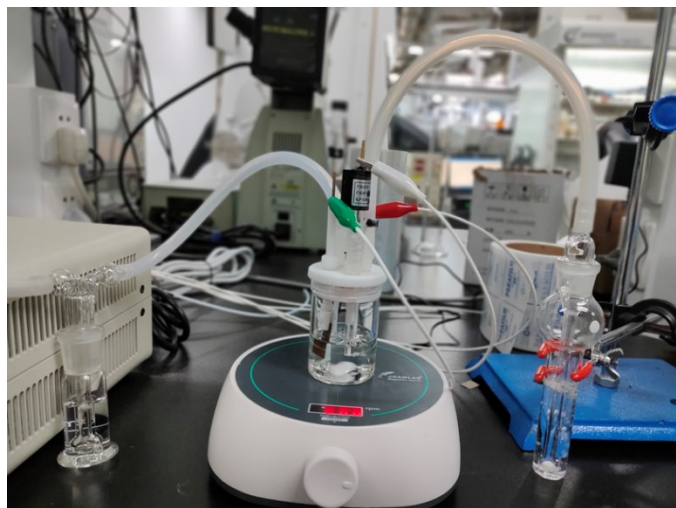

**Fig. S1.** Experimental apparatus of the electrochemical reduction of  $\text{N}_2$  to  $\text{NH}_3$ .

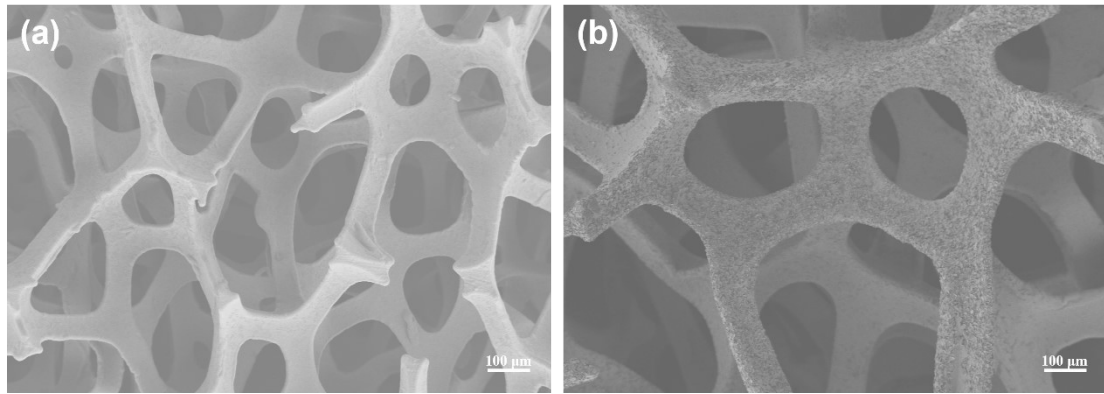

**Fig. S2.** SEM image of (a) bare NF and (b) NiFe<sub>2</sub>O<sub>4</sub>/NF.

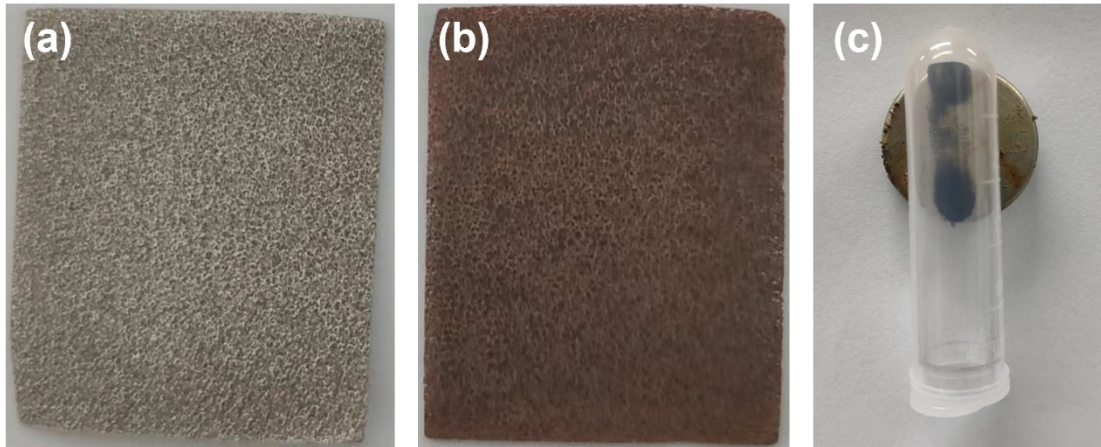

**Fig. S3.** Optical image of (a) bare NF, (b)  $\text{NiFe}_2\text{O}_4/\text{NF}$  and (c) magnetic absorption experiment.

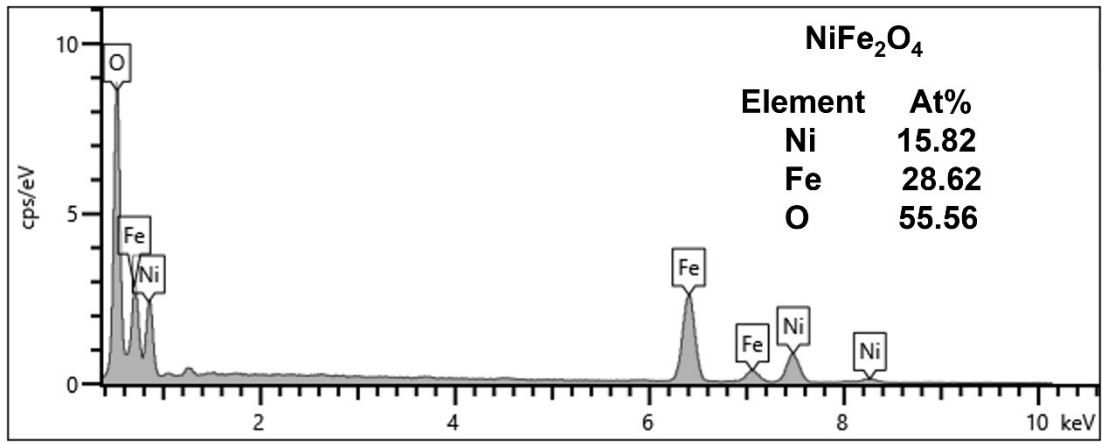

Fig. S4. EDS spectra of NiFe<sub>2</sub>O<sub>4</sub> scraped off NiFe<sub>2</sub>O<sub>4</sub>/NF.

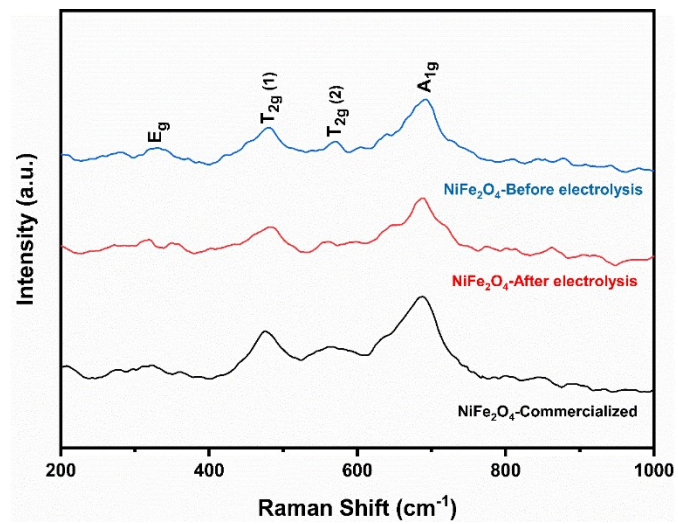

Fig. S5. Raman spectra of NiFe<sub>2</sub>O<sub>4</sub>.



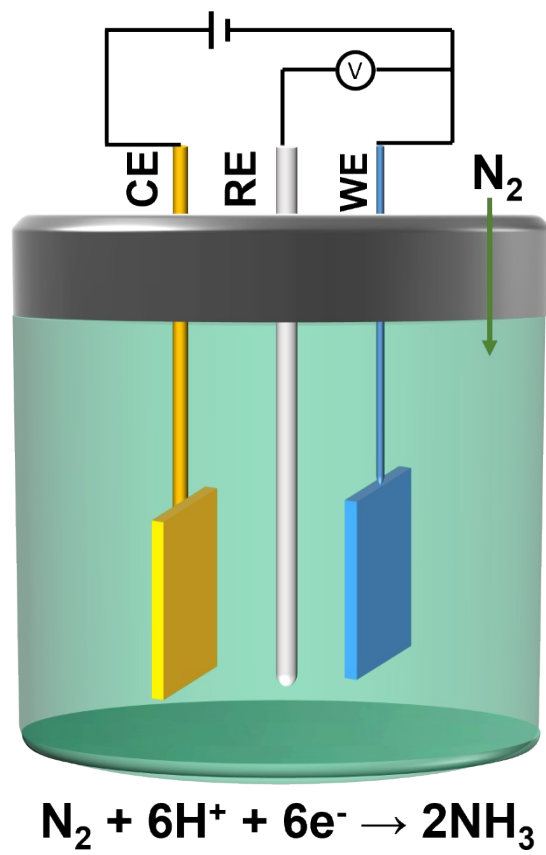

Fig. S6. Schematic diagram of ENRR process.

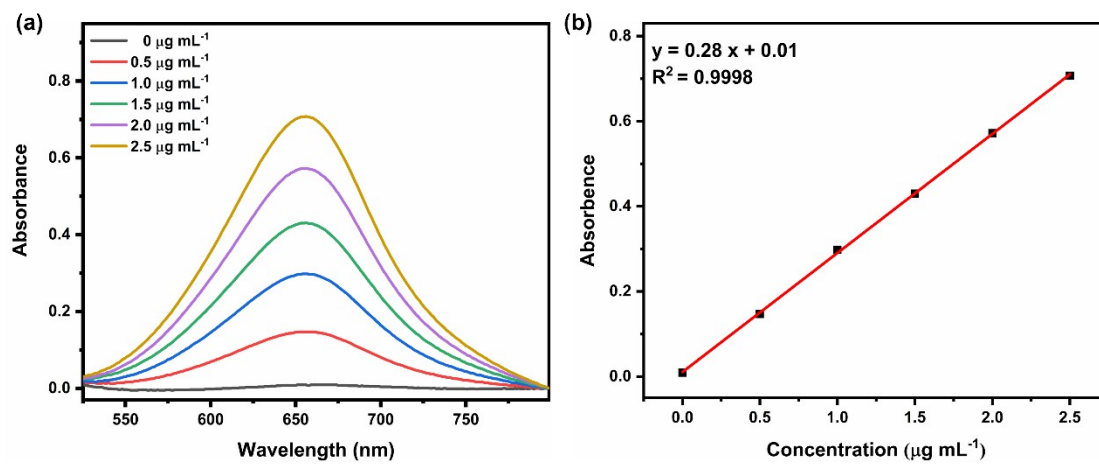

**Fig. S7.** (a) UV-Vis curves of indophenol assays with  $\text{NH}_4^+$  ions after incubated for 60 mins (2-propanol+PBS). (b) Calibration curve used for estimation of  $\text{NH}_3$  by  $\text{NH}_4^+$  ion of different concentrations.

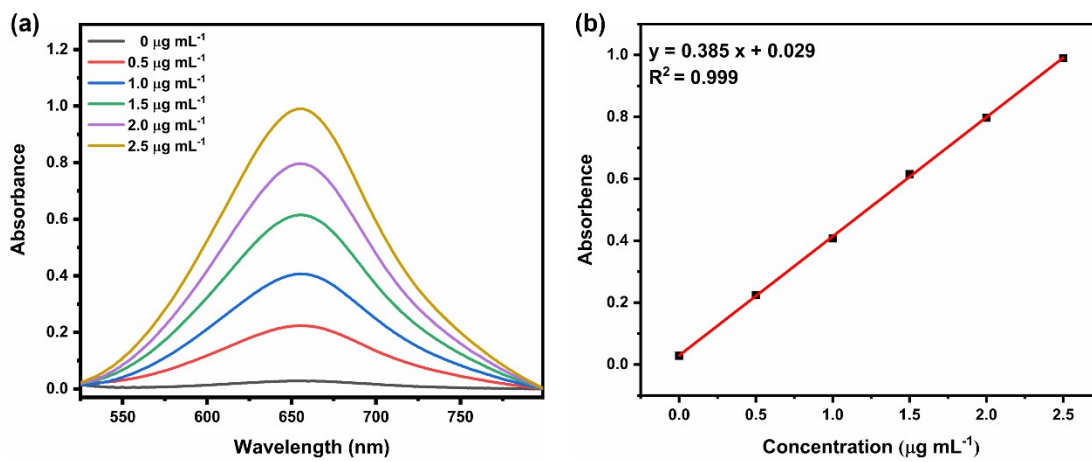

**Fig. S8.** (a) UV-Vis curves of indophenol assays with  $\text{NH}_4^+$  ions after incubated for 60 mins ( $0.1\text{mol L}^{-1} \text{H}_2\text{SO}_4$ ). (b) Calibration curve used for estimation of  $\text{NH}_3$  by  $\text{NH}_4^+$  ion of different concentrations.

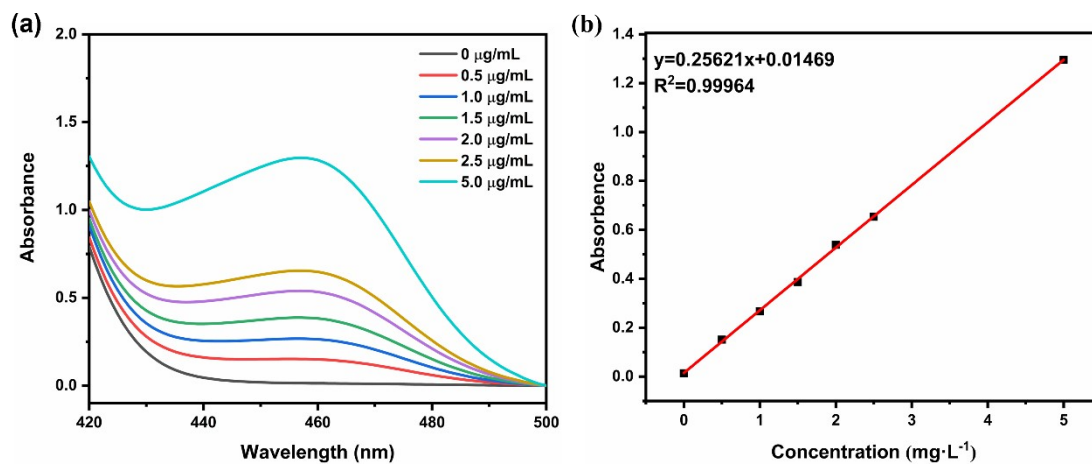

**Fig. S9.** (a) UV-Vis absorption spectra of various  $N_2H_4$  concentration after incubated for 20 min at room temperature. (b) Calibration curve used for calculation of  $N_2H_4$  concentration.

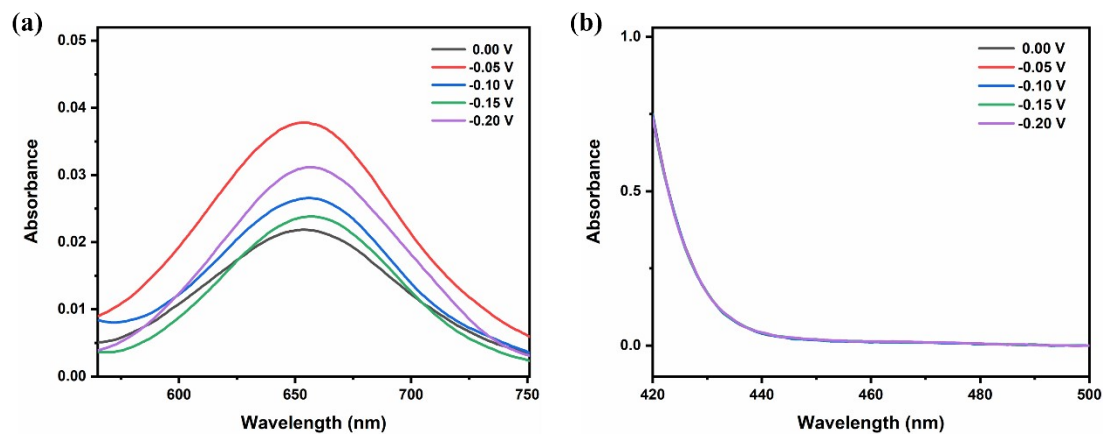

**Fig. S10.** UV-Vis absorption spectra of (a) the electrolytes stained with indophenol indicator during the 2 h electrolysis process on  $\text{NiFe}_2\text{O}_4/\text{NF}$  under different potentials, and (b) the electrolytes estimated by the method of Watt and Chrisp indicator during the 2 h electrolysis process on  $\text{NiFe}_2\text{O}_4/\text{NF}$  under different potentials.

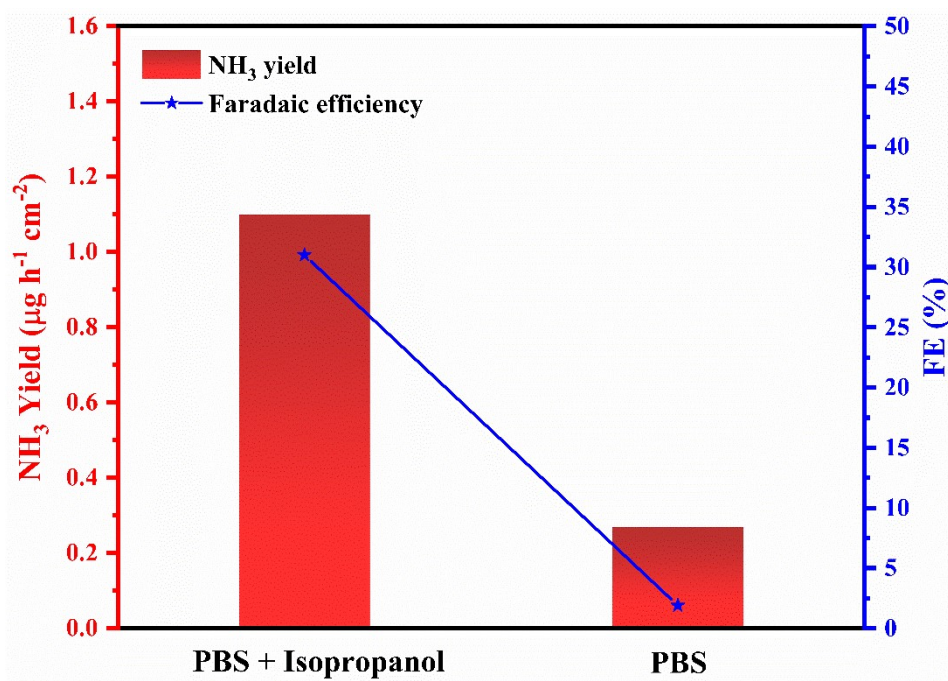

Fig. S11. Comparison of NH<sub>3</sub> yield and faradaic efficiency of different electrolytes.

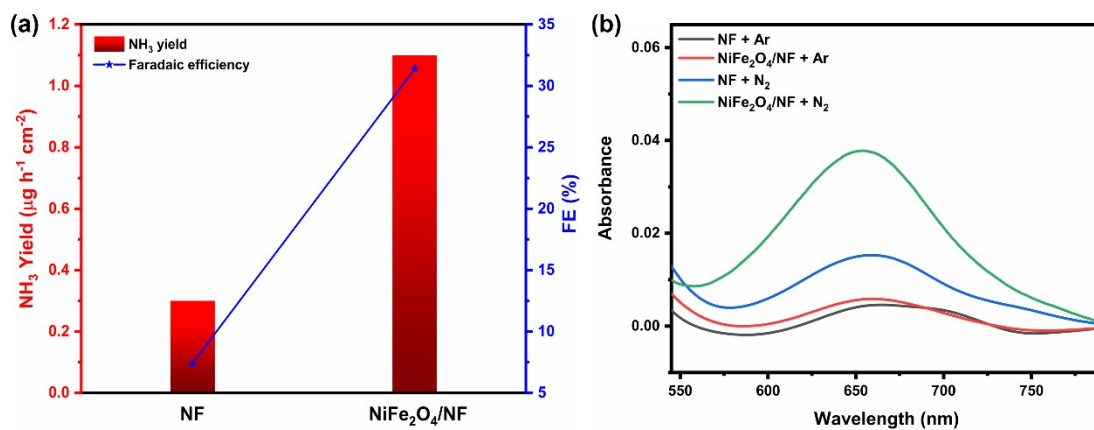

**Fig. S12.** (a) NH<sub>3</sub> yield rates and Faradaic efficiencies of bare NF and NiFe<sub>2</sub>O<sub>4</sub>/NF at -0.05V. (b) The control test was conducted to eliminate the NH<sub>3</sub> pollution caused by the environment.

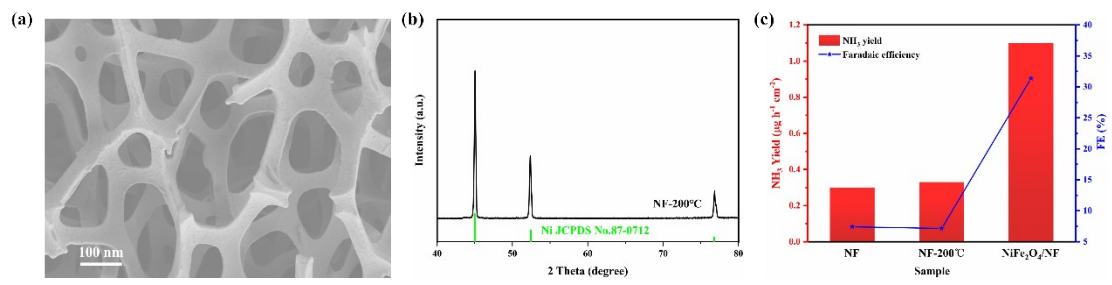

**Fig. S13.** (a) SEM image of NF-200°C. (b) XRD patterns of NF-200°C. (c) Comparison of NH<sub>3</sub> yield and FE of the three electrodes at -0.05V vs RHE.



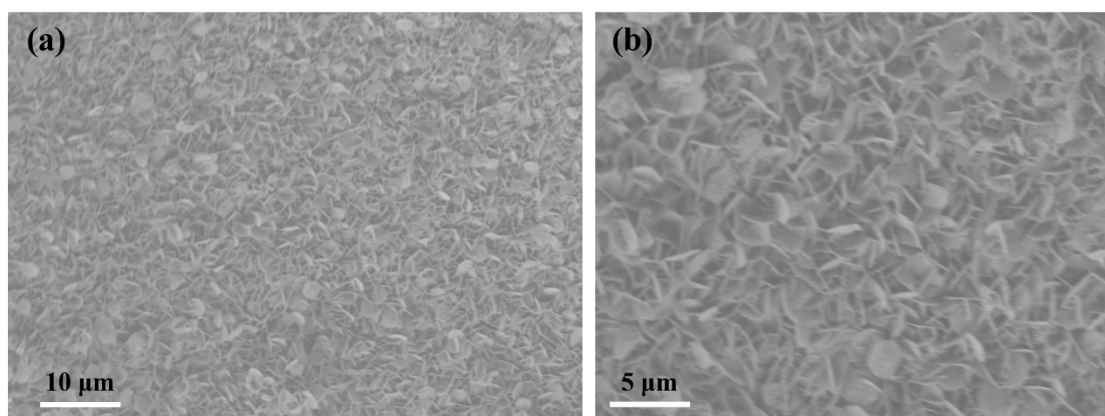

**Fig. S14.** SEM image of NiFe<sub>2</sub>O<sub>4</sub>/NF-After Electrolysis 10h.

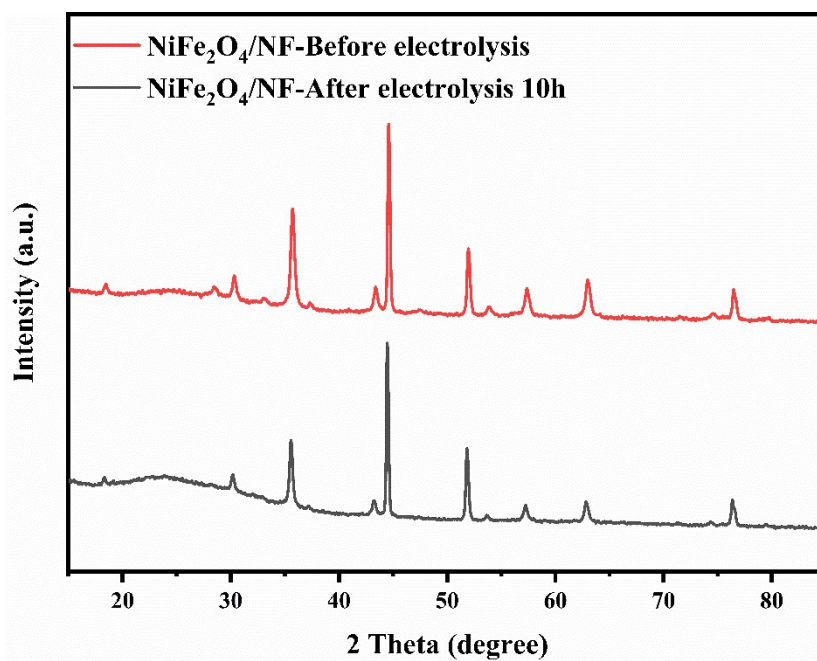

Fig. S15. XRD patterns of NiFe<sub>2</sub>O<sub>4</sub>/NF-Before electrolysis and NiFe<sub>2</sub>O<sub>4</sub>/NF-After electrolysis 10h.

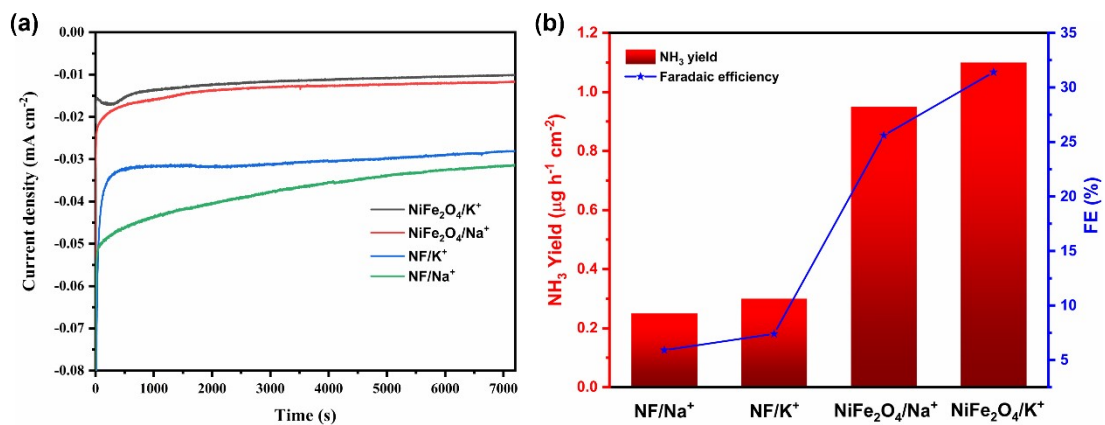

**Fig. S16.** Comparison of two electrodes of ENRR in 0.1 mol L<sup>-1</sup> PBS electrolyte composed of different ions. (a) i-t curves for the N<sub>2</sub>RR on the two electrodes at E=-0.05 V (vs RHE). (b) NH<sub>3</sub> yield rates and Faradaic efficiencies of two electrodes at -0.05 V.

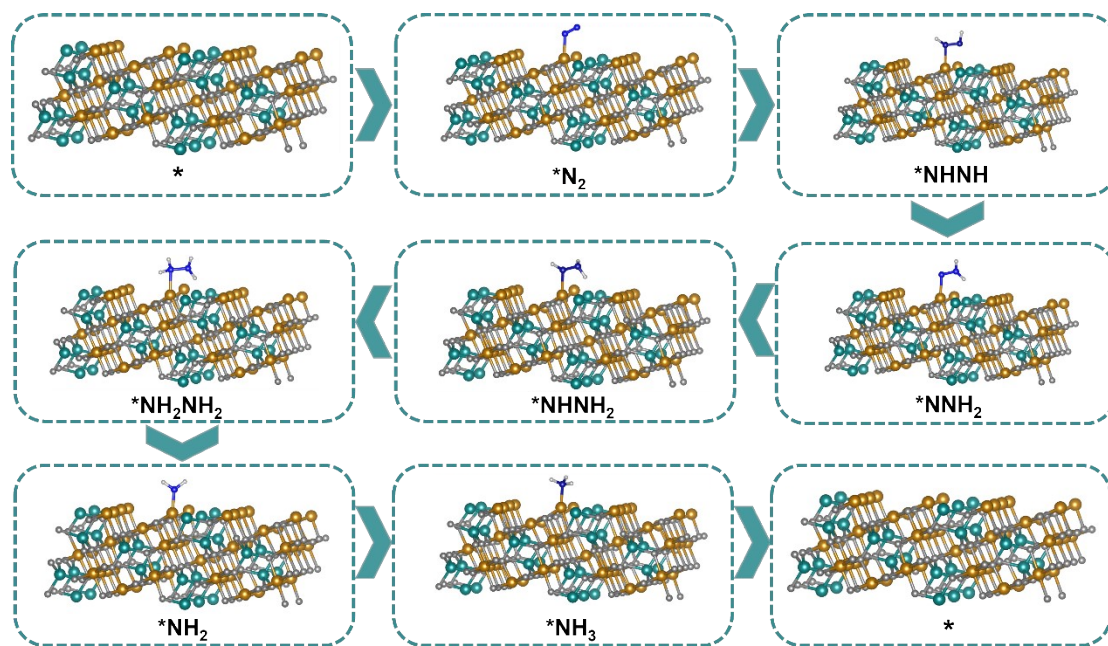

Fig. S17. Schematic diagram of atomic structure of alternative hydrogenation ENRR mechanism (Blue, brown, cyan, white and gray balls represent N, Fe, Ni, H and O, respectively).

**Table S1.** Comparison of the electrocatalytic activity of NiFe<sub>2</sub>O<sub>4</sub>/NF to produce NH<sub>3</sub> through ENRR with respect to the performances of other previously reported Ni, Fe based electrocatalysts.

| Cathode                                 | Electrolyte                                | Anode     | Potential (vs. RHE)   | NH <sub>3</sub> yield (μg h <sup>-1</sup> cm <sup>-2</sup> ) | FE (%)      | Ref.             |
|-----------------------------------------|--------------------------------------------|-----------|-----------------------|--------------------------------------------------------------|-------------|------------------|
| Fe <sub>3</sub> O <sub>4</sub> /Ti      | 0.1M Na <sub>2</sub> SO <sub>4</sub>       | Graphite  | -0.4 V                | 3.43                                                         | 2.6         | <sup>1</sup>     |
| Porous Ni                               | H <sub>2</sub> SO <sub>4</sub> /2-Propanol | Pt        | 3.5 V bias            | 1.07                                                         | 0.9         | <sup>2</sup>     |
| Fe/CNT                                  | Nafion/GDL                                 | Pt        | -0.2 V                | 0.22                                                         | 0.03        | <sup>3</sup>     |
| Fe/Fe <sub>3</sub> O <sub>4</sub>       | 0.1M PBS                                   | Pt        | -0.3 V                | 0.19                                                         | 8.29        | <sup>4</sup>     |
| CoFe <sub>2</sub> O <sub>4</sub> /rGO   | 0.1M Na <sub>2</sub> SO <sub>4</sub>       | Pt        | -0.4 V                | 2.57                                                         | 6.2         | <sup>5</sup>     |
| Zr/α -FeOOH                             | 0.1M Na <sub>2</sub> SO <sub>4</sub>       | Pt        | -0.5 V                | 8.5                                                          | 35.63       | <sup>6</sup>     |
| Fe /FTO                                 | [P <sub>6,6,6,14</sub> ] [eFAP]            | Pt        | -0.8 V                | 0.29                                                         | 60          | <sup>7</sup>     |
| <b>NiFe<sub>2</sub>O<sub>4</sub>/NF</b> | <b>2-Propanol/PBS</b>                      | <b>Pt</b> | <b>-0.65 V vs SCE</b> | <b>1.1</b>                                                   | <b>31.4</b> | <b>This work</b> |

1 Q. Liu, X. Zhang, B. Zhang, Y. Luo, G. Cui, F. Xie and X. Sun, *Nanoscale*, 2018, **10**, 14386–14389.

2 K. Kim, N. Lee, C.-Y. Yoo, J.-N. Kim, H. C. Yoon and J.-I. Han, *J. Electrochem. Soc.*, 2016, **163**, F610–F612.

3 S. Chen, S. Perathoner, C. Ampelli, C. Mebrahtu, D. Su and G. Centi, *Angew. Chemie - Int. Ed.*, 2017, **56**, 2699–2703.

4 L. Hu, A. Khaniya, J. Wang, G. Chen, W. E. Kaden and X. Feng, *ACS Catal.*, 2018, **8**, 9312–9319.

5 M. I. Ahmed, S. Chen, W. Ren, X. Chen and C. Zhao, *Chem. Commun.*, 2019, **55**, 12184–12187.

6 J. Tan, X. He, F. Yin, X. Liang, G. Li and Z. Li, *Appl. Surf. Sci.*, 2021, **567**, 150801.

7 M. Ali, F. Zhou, K. Chen, C. Kotzur, C. Xiao, L. Bourgeois, X. Zhang and D. R. MacFarlane, *Nat. Commun.*, 2016, **7**, 1–5.
