# Supplementary figures and images for: Efficient N2 electroreduction to ammonia in an isopropanol–PBS electrolyte using NiFe2O4in situ grown on nickel foam
Source: Royal Society of Chemistry journal article supplement (doi:10.1039/d2ya00364c), 2023-01-01

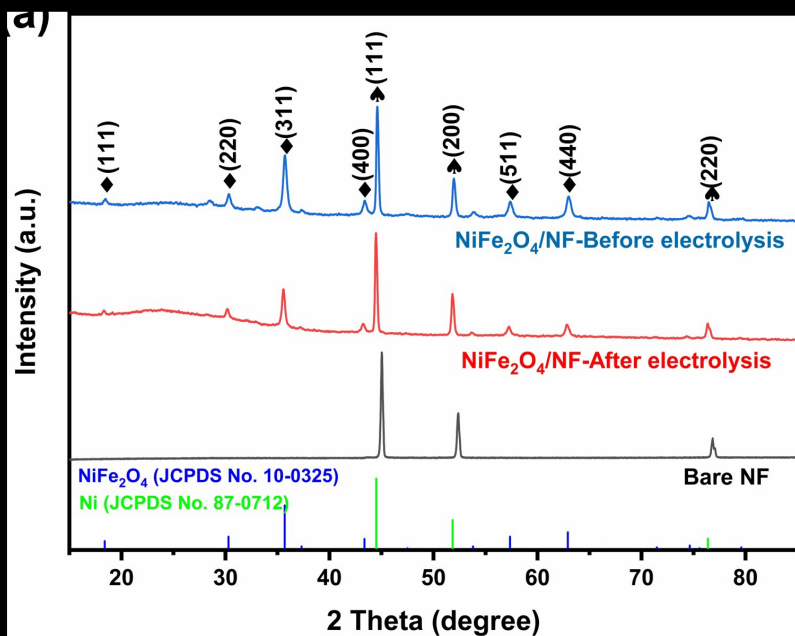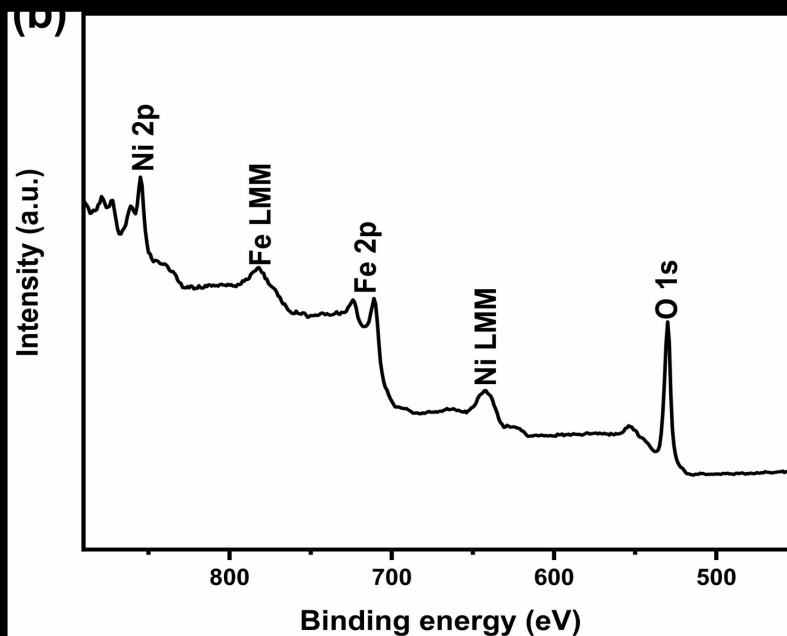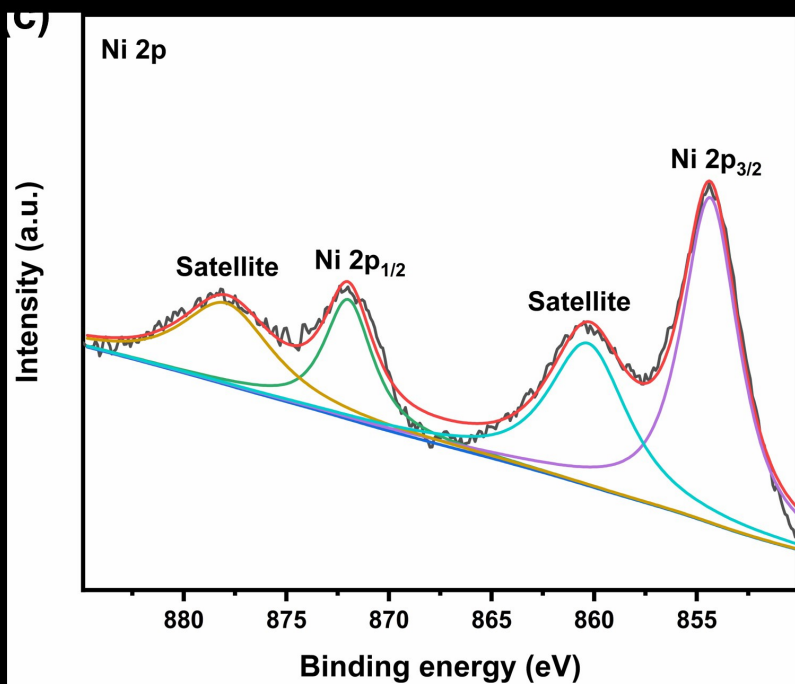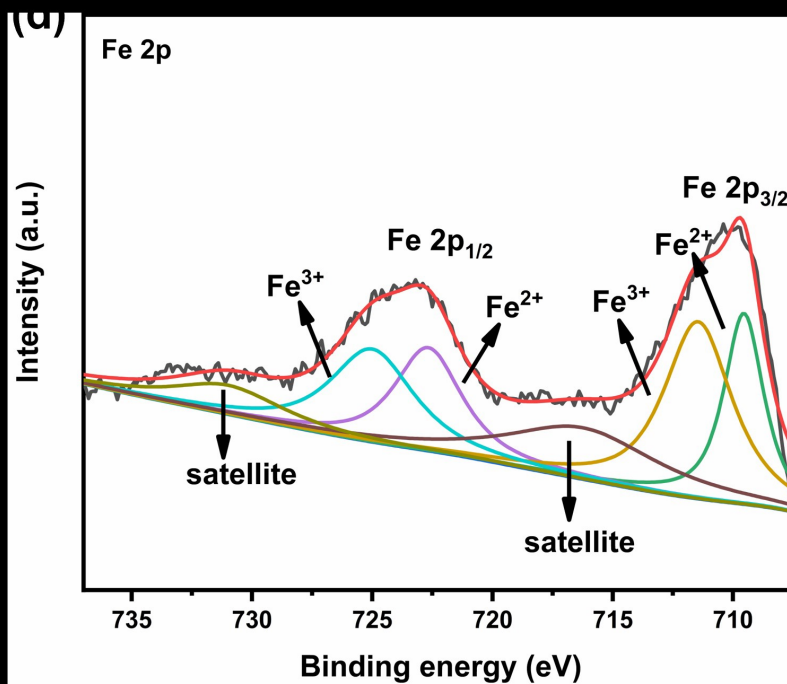

Supplement: d2ya00364c2.pdf [file d2ya00364c2.pdf]
